# Supplementary material for: Gln40 deamidation blocks structural reconfiguration and activation of SCF ubiquitin ligase complex by Nedd8
Source: PubMed Central journal article supplement (PMC4686759; doi:10.1038/ncomms10053), 2015-12-03
Supplement: ncomms10053-s1.pdf [file ncomms10053-s1.pdf]

## Supplementary Figure 1

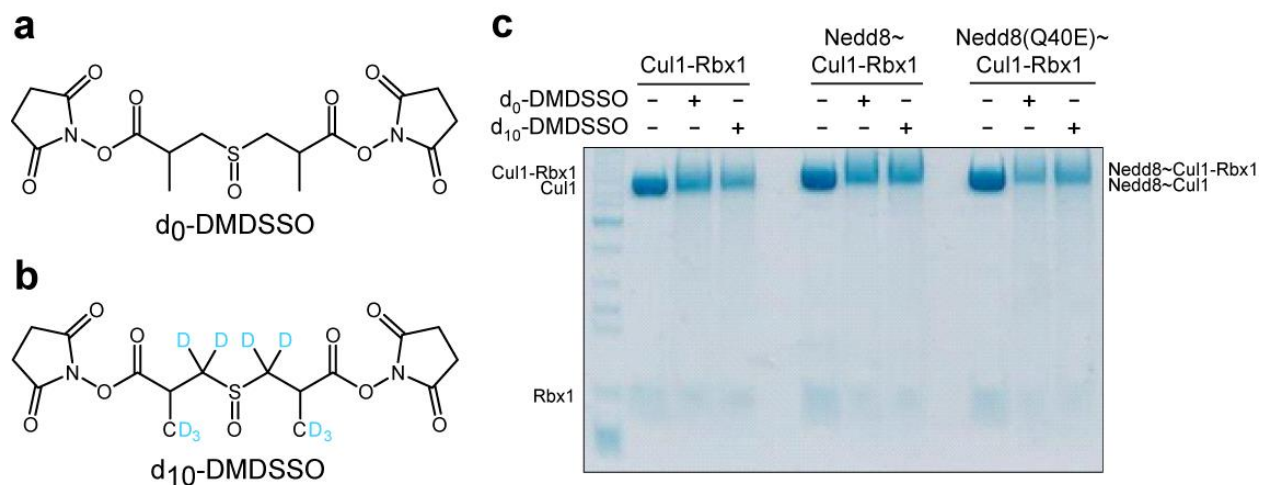

**Supplementary Figure 1: d<sub>0</sub>- and d<sub>10</sub>-DMDSSO structure and cross-linking efficiency.** Molecular structures of (a) d<sub>0</sub>-DMDSSO and (b) d<sub>10</sub>-DMDSSO. (c) SDS-PAGE separation of unneddylated, wild-type neddylated, and mutant Q40E neddylated Cul1-Rbx1 complexes cross-linked by d<sub>0</sub>- and d<sub>10</sub>-DMDSSO.

# Supplementary Figure 2

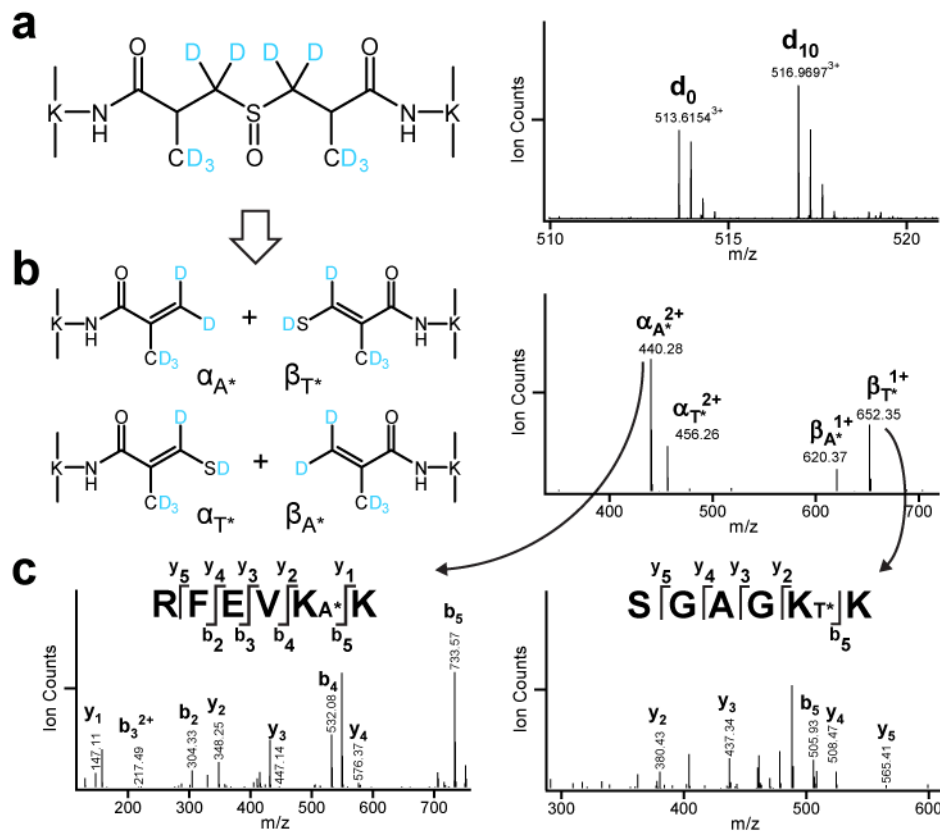

**Supplementary Figure 2: MS<sup>n</sup> analysis of d<sub>10</sub>-DMDSSO inter-linked peptides.** (a) MS<sup>1</sup> spectrum shows the detection of a pair of d<sub>0</sub>-DMDSSO and d<sub>10</sub>-DMDSSO cross-linked peptides (m/z 513.6154<sup>3+</sup> and m/z 516.9697<sup>3+</sup>), whose spectral relative abundance ratio is used for quantitation. (b) MS<sup>2</sup> analysis of the d<sub>10</sub>-DMDSSO inter-linked peptides  $\alpha$ - $\beta$  (m/z 516.9697<sup>3+</sup>) yielded two peptide fragment pairs:  $\alpha_{A^*}/\beta_{T^*}$  (m/z 440.28<sup>2+</sup>/652.35<sup>1+</sup>) and  $\alpha_{T^*}/\beta_{A^*}$  (m/z 456.26<sup>2+</sup>/620.37<sup>1+</sup>), confirming its cross-link type as an interlink. Subsequent MS<sup>3</sup> analyses of the  $\alpha_{A^*}$  (m/z 440.28<sup>2+</sup>) and  $\beta_{T^*}$  (652.35<sup>1+</sup>) ions produced series of y and b ions which enabled unambiguous identification of  $\alpha_{A^*}$  as RFEVK<sub>A</sub><sup>+</sup>K of Rbx1 and  $\beta_{T^*}$  as SGAGK<sub>T</sub><sup>+</sup>K of Rbx1. Integration of the MS<sup>n</sup> (i.e. MS<sup>1</sup>, MS<sup>2</sup> and MS<sup>3</sup>) data has confirmed the d<sub>10</sub>-DMDSSO cross-linked peptide as an intra-subunit interlink between K19 and K25 of Rbx1. K<sub>A</sub><sup>+</sup>: d<sub>10</sub>-DMDSSO alkene modified lysine; K<sub>T</sub><sup>+</sup>: d<sub>10</sub>-DMDSSO unsaturated thiol modified lysine.

## Supplementary Figure 3

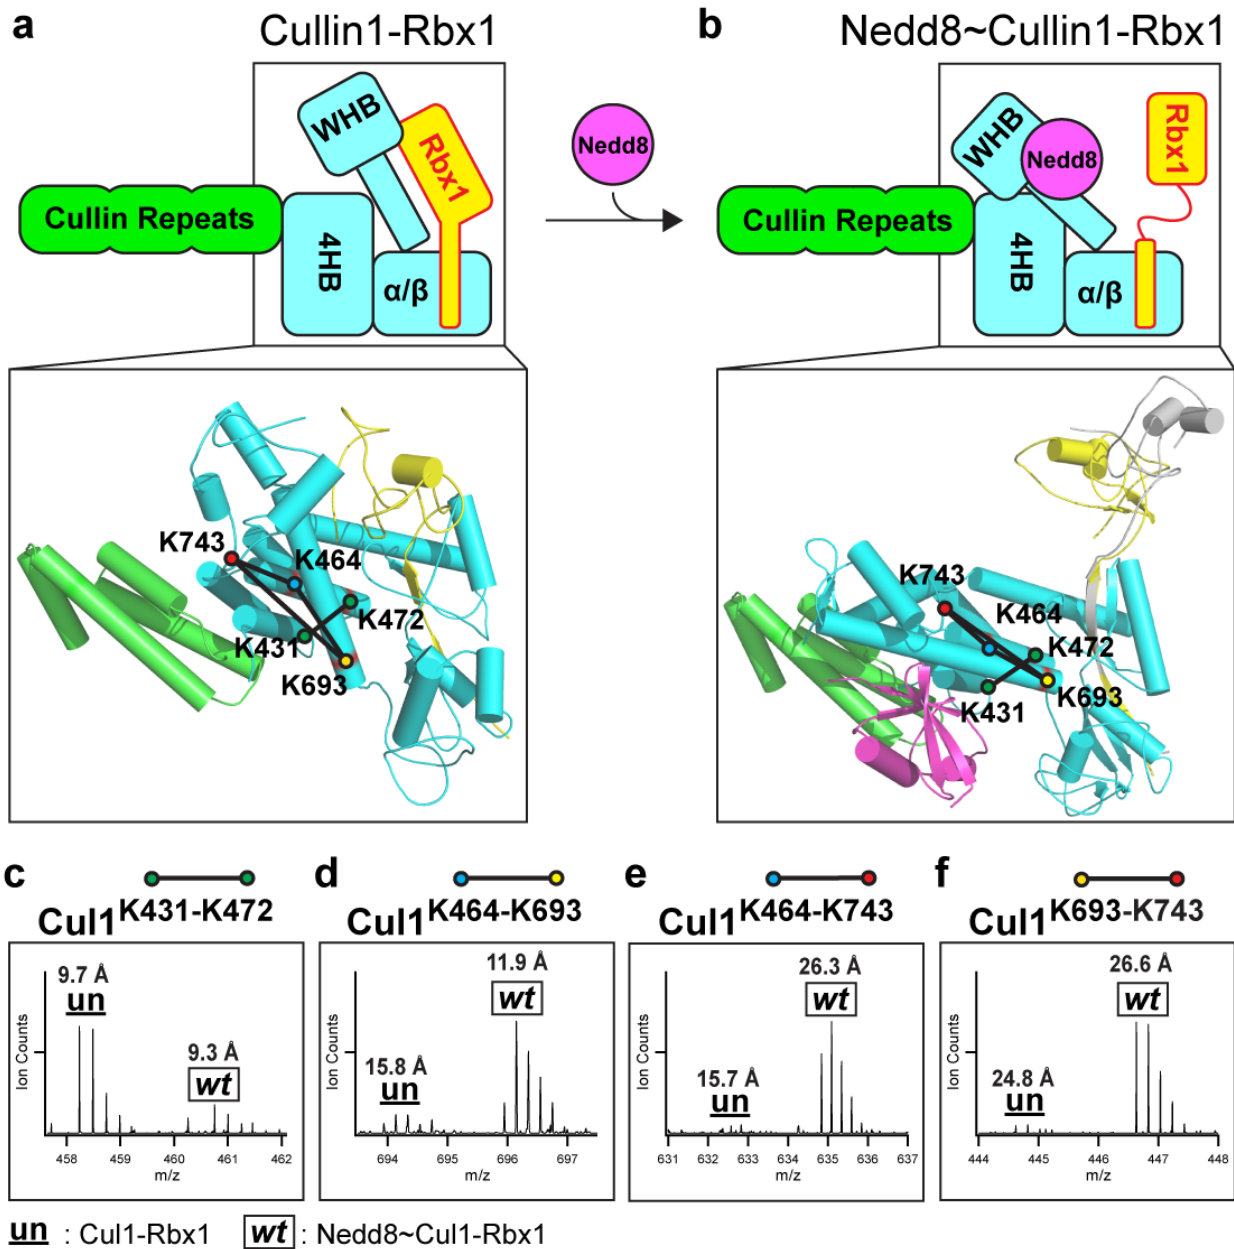

**Supplementary Figure 3: Quantitative analysis of K-K linkages to determine neddylation-dependent structural changes in the Cul1-Rbx1 complex.** Structural representation of (a) unneddylated Cul1-Rbx1 in the “closed” state, (b) neddylated Cul1-Rbx1 in the “open” conformation. The insets display the mapping of four selected inter-links onto the structures of Cul1-Rbx1 complexes, whose MS1 spectra are displayed as follows: (c) Cul1<sup>K431</sup>-Cul1<sup>K472</sup>, (d) Cul1<sup>K464</sup>-Cul1<sup>K693</sup>, (e) Cul1<sup>K464</sup>-Cul1<sup>K743</sup>, and (f) Cul1<sup>K693</sup>-Cul1<sup>K743</sup>. These d<sub>0</sub>/d<sub>10</sub>-DMDSSO

cross-linked peptide pairs measured in MS1 were used to determine their relative abundance ratios between unneddylated and neddylated Cul1-Rbx1 complexes for quantitative analysis (Table 1).

**Supplementary Table 1: Detailed Summary of DMDSSO Cross-linked Peptides of Cul1-Rbx1 complexes Using LC-MS<sup>n</sup>.**

| Linkage               | Linkage Details           | MS1 z    | MS1 m/z  | MS2 m/z | MS2 z | MS2 ppm  | MS1 m/z  | MS2 m/z | MS2 z | MS2 ppm                              | Peptide Sequence                                     | Protein | AA #    |
|-----------------------|---------------------------|----------|----------|---------|-------|----------|----------|---------|-------|--------------------------------------|------------------------------------------------------|---------|---------|
| Cul1 - Cul1           | Cul1: 63 - Cul1: 131      | 4        |          |         |       |          | 691.1025 | 448.738 | 2     | 2.3                                  | QSM(Oxidation)AK(Aikene)SR                           | Cul1    | 63      |
|                       |                           |          |          |         |       |          |          | 924.464 | 2     | 0.9                                  | FSSK(Thiol)VLN(Deamidated)GIC(Carbamidomethyl)JAYLNR | Cul1    | 131     |
|                       | Cul1: 337 - Cul1: 750     | 4        | 493.0421 | 600.822 | 2     | 6.2      | 495.5573 | 603.339 | 2     | 8.3                                  | IQDGLGELK(Thiol)K                                    | Cul1    | 337     |
|                       |                           |          |          | 376.258 | 2     | 1.4      |          | 378.775 | 2     | 4.9                                  | VPVIK(Aikene)K                                       | Cul1    | 750     |
|                       | Cul1: 410 - Cul1: 701     | 5        | 759.7628 | 920.434 | 2     | -6.6     |          |         |       |                                      | FINNNAVTK(Thiol)MAQSSSK                              | Cul1    | 410     |
|                       |                           |          |          | 645.975 | 3     | 3.2      |          |         |       |                                      | Q(Gln->pyro-Glu)EQETTHK(Aikene)NIEEDRK               | Cul1    | 701     |
|                       |                           | 5        | 762.7680 | 920.441 | 2     | 1.1      |          |         |       |                                      | FINNNAVTK(Thiol)MAQSSSK                              | Cul1    | 410     |
|                       |                           |          |          | 651.650 | 3     | 2.4      |          |         |       |                                      | QEQTTHK(Aikene)NIEEDRK                               | Cul1    | 701     |
|                       | Cul1: 410 - Cul1: 720     | 4        | 651.5775 | 920.443 | 2     | 3.2      | 654.3420 | 922.957 | 2     | 1.4                                  | FINNNAVTK(Thiol)MAQSSSK                              | Cul1    | 410     |
|                       |                           |          |          | 373.707 | 2     | 2.1      |          | 376.222 | 2     | 0.2                                  | IMK(Aikene)MR                                        | Cul1    | 720     |
|                       | Cul1: 410 - Cul1: 743     | 4        | 618.8148 | 920.442 | 2     | 2.1      | 621.3307 | 922.959 | 2     | 3.6                                  | FINNNAVTK(Thiol)MAQSSSK                              | Cul1    | 410     |
|                       |                           |          |          | 308.185 | 2     | 2.3      |          | 310.700 | 2     | 0.1                                  | FK(Aikene)PR                                         | Cul1    | 743     |
|                       |                           | 4        | 622.8141 | 928.440 | 2     | 2.7      | 625.5818 | 930.953 | 2     | -0.2                                 | FINNNAVTK(Thiol)M(Oxidation)AQSSSK                   | Cul1    | 410     |
|                       |                           |          |          | 308.185 | 2     | 2.3      |          | 310.700 | 2     | 0.1                                  | FK(Aikene)PR                                         | Cul1    | 743     |
|                       |                           | 4        | 752.9080 | 920.440 | 2     | 0.0      |          |         |       |                                      | FINNNAVTK(Thiol)MAQSSSK                              | Cul1    | 410     |
|                       |                           |          |          | 576.371 | 2     | 4.2      |          |         |       |                                      | FK(Aikene)PRVPVIK                                    | Cul1    | 743     |
|                       | Cul1: 410 - Cul1: 750     | 4        | 652.8524 | 376.258 | 2     | 1.4      | 655.3687 | 378.774 | 2     | 2.2                                  | FINNNAVTK(Thiol)MAQSSSK                              | Cul1    | 410     |
|                       |                           |          |          | 920.441 | 2     | 1.1      |          | 922.954 | 2     | -1.9                                 | VPVIK(Aikene)K                                       | Cul1    | 750     |
|                       | Cul1: 417 - Cul1: 689     | 4        | 773.3956 | 802.896 | 2     | 4.8      | 775.9152 | 805.415 | 2     | 8.9                                  | MAQSSSK(Thiol)SPELLAR                                | Cul1    | 417     |
|                       |                           |          |          | 734.896 | 2     | 1.3      |          | 737.414 | 2     | 4.4                                  | VNINVPMK(Aikene)TEQK                                 | Cul1    | 689     |
|                       | Cul1: 417 - Cul1: 689 693 | 5        | 815.6091 | 802.897 | 2     | 6.0      |          |         |       |                                      | MAQSSSK(Thiol)SPELLAR                                | Cul1    | 417     |
|                       |                           |          |          | 828.078 | 3     | 5.2      |          |         |       |                                      | VNINVPMK(Thiol1)TEQK(Thiol2)QEQTTHK                  | Cul1    | 689 693 |
|                       | Cul1: 417 - Cul1: 693     | 4        | 798.8813 | 810.883 | 2     | -8.2     |          |         |       |                                      | M(Oxidation)AQSSSK(Thiol)SPELLAR                     | Cul1    | 417     |
|                       |                           |          |          | 777.873 | 2     | -0.5     |          |         |       |                                      | TEQK(Aikene)QEQTTHK                                  | Cul1    | 693     |
|                       | Cul1: 431 - Cul1: 468     | 4        | 546.5285 | 563.768 | 2     | 1.4      | 549.5465 | 566.286 | 2     | 5.5                                  | YC(Carbamidomethyl)DSLK(Thiol)K                      | Cul1    | 431     |
|                       |                           |          |          | 520.288 | 2     | 4.1      |          | 522.802 | 2     | 0.8                                  | FYAK(Aikene)MLAK                                     | Cul1    | 468     |
|                       | Cul1: 431 - Cul1: 472     | 4        | 458.2395 | 563.768 | 2     | 1.4      | 460.7551 | 566.284 | 2     | 2.0                                  | YC(Carbamidomethyl)DSLK(Thiol)K                      | Cul1    | 431     |
|                       |                           |          |          | 343.705 | 2     | 1.4      |          | 346.221 | 2     | 2.2                                  | MLAK(Aikene)R                                        | Cul1    | 472     |
|                       |                           | 4        | 443.9836 | 519.270 | 2     | -0.8     | 446.4987 | 537.772 | 2     | -0.3                                 | YCDLAK(Aikene)K                                      | Cul1    | 431     |
|                       |                           |          |          | 343.705 | 2     | 1.4      |          | 346.221 | 2     | 2.2                                  | MLAK(Aikene)R                                        | Cul1    | 472     |
|                       | Cul1: 464 - Cul1: 693     | 5        | 693.9347 | 947.457 | 2     | -1.3     |          |         |       |                                      | YIEDKDFVQK(Thiol)FYAK                                | Cul1    | 464     |
|                       |                           |          |          | 518.917 | 3     | -1.9     |          |         |       |                                      | TEQK(Aikene)QEQTTHK                                  | Cul1    | 693     |
|                       | Cul1: 464 - Cul1: 743     | 4        | 632.3239 | 947.457 | 2     | -1.3     | 634.8438 | 949.979 | 2     | 5.4                                  | YIEDKDFVQK(Thiol)FYAK                                | Cul1    | 464     |
|                       |                           |          |          | 308.186 | 2     | 5.6      |          | 310.702 | 2     | 6.5                                  | FK(Aikene)PR                                         | Cul1    | 743     |
|                       | Cul1: 468 - Cul1: 693     | 5        | 529.6614 | 536.276 | 2     | 7.6      |          |         |       |                                      | FYAK(Thiol)MLAK                                      | Cul1    | 468     |
|                       |                           |          |          | 518.916 | 3     | -3.9     |          |         |       |                                      | TEQK(Aikene)QEQTTHK                                  | Cul1    | 693     |
|                       |                           | 4        | 661.5743 | 793.859 | 2     | -0.5     | 664.0906 | 522.803 | 2     | 2.7                                  | FYAK(Aikene)MLAK                                     | Cul1    | 468     |
|                       |                           |          |          |         |       |          |          | 796.375 | 2     | -0.1                                 | TEQK(Thiol)QEQTTHK                                   | Cul1    | 693     |
|                       | Cul1: 468 - Cul1: 743     | 4        | 426.7346 | 536.275 | 2     | 5.7      |          |         |       |                                      | FYAK(Thiol)MLAK                                      | Cul1    | 468     |
|                       |                           |          |          | 308.185 | 2     | 2.3      |          |         |       |                                      | FK(Aikene)PR                                         | Cul1    | 743     |
|                       | Cul1: 472 - Cul1: 689     | 4        | 555.7946 | 343.705 | 2     | 1.4      |          |         |       |                                      | MLAK(Aikene)R                                        | Cul1    | 472     |
|                       |                           |          |          | 758.878 | 2     | -0.7     |          |         |       |                                      | VNINVPM(Oxidation)K(Thiol)TEQK                       | Cul1    | 689     |
|                       |                           | 5        | 638.1315 | 736.387 | 1     | 3.5      |          |         |       |                                      | MLAK(Sulfenic)R                                      | Cul1    | 472     |
|                       |                           |          |          | 613.316 | 4     | 3.2      |          |         |       |                                      | VNINVPMK(Aikene)TEQKQEQTTHK                          | Cul1    | 689     |
|                       |                           | 4        | 551.7966 | 750.883 | 2     | 2.5      | 554.3110 | 753.394 | 2     | -3.7                                 | MLAK(Aikene)R                                        | Cul1    | 472     |
|                       |                           |          |          | 343.705 | 2     | 1.4      |          | 346.221 | 2     | 2.2                                  | VNINVPMK(Thiol)TEQK                                  | Cul1    | 689     |
|                       | Cul1: 472 - Cul1: 693     | 5        | 458.8307 | 359.691 | 2     | 1.2      |          |         |       |                                      | MLAK(Thiol)R                                         | Cul1    | 472     |
|                       |                           |          |          | 518.918 | 3     | 0.0      |          |         |       |                                      | TEQK(Aikene)QEQTTHK                                  | Cul1    | 693     |
|                       |                           | 4        | 573.7870 | 343.704 | 2     | -1.6     | 575.8003 | 741.417 | 1     | 1.6                                  | MLAK(Aikene)R                                        | Cul1    | 472     |
|                       |                           |          |          | 793.859 | 2     | -0.5     |          | 796.377 | 2     | 2.4                                  | TEQK(Thiol)QEQTTHK                                   | Cul1    | 693     |
|                       | 4                         | 577.2838 | 351.702  | 2       | 0.0   |          |          |         |       | M(Oxidation)LAK(Aikene)R             | Cul1                                                 | 472     |         |
|                       |                           |          | 793.860  | 2       | 0.8   |          |          |         |       | TEQK(Thiol)QEQTTHK                   | Cul1                                                 | 693     |         |
|                       | 4                         | 797.1608 | 686.405  | 1       | 4.7   |          |          |         |       | MLAK(Aikene)R                        | Cul1                                                 | 472     |         |
|                       |                           |          | 817.422  | 3       | 7.0   |          |          |         |       | VNINVPMKTEQK(Aikene)QEQTTHK          | Cul1                                                 | 693     |         |
| Cul1: 493 - Cul1: 720 | 4                         | 574.5350 | 766.351  | 2       | 1.8   |          |          |         |       | LK(Thiol)QAC(Carbamidomethyl)GFEYTSK | Cul1                                                 | 493     |         |
|                       |                           |          | 373.707  | 2       | 2.1   |          |          |         |       | IMK(Aikene)MR                        | Cul1                                                 | 720     |         |
| Cul1: 493 - Cul1: 743 | 4                         |          |          |         |       | 544.2850 | 768.867  | 2       | 2.2   | LK(Thiol)QAC(Carbamidomethyl)GFEYTSK | Cul1                                                 | 493     |         |
|                       |                           |          |          |         |       |          | 310.701  | 2       | 3.3   | FK(Aikene)PR                         | Cul1                                                 | 743     |         |
| Cul1: 493 - Cul1: 750 | 4                         |          |          |         |       | 578.3270 | 768.869  | 2       | 4.8   | LK(Thiol)QAC(Carbamidomethyl)GFEYTSK | Cul1                                                 | 493     |         |
|                       |                           |          |          |         |       |          | 378.774  | 2       | 2.2   | VPVIK(Aikene)K                       | Cul1                                                 | 750     |         |
| Cul1: 676 - Cul1: 693 | 5                         | 560.4869 | 613.836  | 2       | 3.7   |          |          |         |       | LYLGYK(Thiol)NKK                     | Cul1                                                 | 676     |         |
|                       |                           |          | 518.918  | 3       | 0.0   |          |          |         |       | TEQK(Aikene)QEQTTHK                  | Cul1                                                 | 693     |         |
| Cul1: 693 - Cul1: 743 | 5                         | 444.6213 | 308.184  | 2       | -1.0  | 446.6350 | 310.700  | 2       | 0.1   | TEQK(Thiol)QEQTTHK                   | Cul1                                                 | 693     |         |
|                       |                           |          | 529.575  | 3       | -0.7  |          | 531.253  | 3       | 1.0   | FK(Aikene)PR                         | Cul1                                                 | 743     |         |
|                       | 4                         | 555.5247 | 793.861  | 2       | 2.0   | 558.0410 | 796.378  | 2       | 3.7   | TEQK(Thiol)QEQTTHK                   | Cul1                                                 | 693     |         |
|                       |                           |          | 308.184  | 2       | -1.0  |          | 310.701  | 2       | 3.3   | FK(Aikene)PR                         | Cul1                                                 | 743     |         |
| Cul1: 701 - Cul1: 708 | 4                         | 763.1446 | 920.397  | 2       | 2.9   | 765.6613 | 922.911  | 2       | 1.1   | Q(Gln->pyro-Glu)EQETTHK(Thiol)NIEEDR | Cul1                                                 | 701     |         |
|                       |                           |          | 596.893  | 2       | 0.9   |          | 599.409  | 2       | 1.4   | K(Aikene)LLIQAAIVR                   | Cul1                                                 | 708     |         |
|                       | 4                         | 767.4011 | 928.910  | 2       | 2.6   | 769.9200 | 931.424  | 2       | 0.8   | QEQTTHK(Thiol)NIEEDR                 | Cul1                                                 | 701     |         |
|                       |                           |          | 596.895  | 2       | 4.3   |          | 599.410  | 2       | 3.1   | K(Aikene)LLIQAAIVR                   | Cul1                                                 | 708     |         |
| Cul1: 701 - Cul1: 751 | 4                         |          |          |         |       | 785.4117 | 986.959  | 2       | 1.5   | Q(Gln->pyro-Glu)EQETTHK(Thiol)NIEEDR | Cul1                                                 | 701     |         |
|                       |                           |          |          |         |       |          | 574.346  | 2       | 3.8   | K(Aikene)CIDILIEK                    | Cul1                                                 | 751     |         |
|                       | 4                         |          |          |         |       | 799.4044 | 986.960  | 2       | 2.5   | Q(Gln->pyro-Glu)EQETTHK(Thiol)NIEEDR | Cul1                                                 | 701     |         |
|                       |                           |          |          |         |       |          | 602.856  | 2       | 2.4   | K(Aikene)C(Carbamidomethyl)IDILIEK   | Cul1                                                 | 751     |         |

|              |                       |   |          |          |   |      |          |         |   |      |                                       |       |     |
|--------------|-----------------------|---|----------|----------|---|------|----------|---------|---|------|---------------------------------------|-------|-----|
|              | Cul1: 708 - Cul1: 751 | 5 | 703.3976 | 785.109  | 3 | 1.3  | 705.4105 | 786.784 | 3 | -1.4 | NIEEDRK(Thio)LLIQAAIVRIMK             | Cul1  | 708 |
|              |                       |   |          | 571.828  | 2 | -0.2 |          | 574.345 | 2 | 2.1  | K(Aikene)CIDILIEK                     | Cul1  | 751 |
|              | Cul1: 750 - Cul1: 769 | 3 | 919.8239 | 656.403  | 2 | 1.3  |          |         |   |      | FKPRVPVK(Thio)K                       | Cul1  | 750 |
|              |                       |   |          | 1428.654 | 1 | 0.8  |          |         |   |      | VDEGK(Aikene)DTYSYLA                  | Cul1  | 769 |
| Rbx1 - Rbx1  | Rbx1: 19 - Rbx1: 25   | 4 | 385.4660 | 308.177  | 2 | 1.1  | 387.9807 | 310.693 | 2 | 2.1  | SGAGK(Aikene)K                        | Rbx1  | 19  |
|              |                       |   |          | 453.748  | 2 | 2.4  |          | 456.262 | 2 | -1.4 | RFEVK(Thio)K                          | Rbx1  | 25  |
|              | Cul1: 493 - Rbx1: 89  | 4 | 580.7935 | 766.351  | 2 | 1.8  | 583.3085 | 768.867 | 2 | 2.2  | LK(Thio)QAC(Carbamidomethyl)GFEYTSK   | Cul1  | 493 |
|              |                       |   |          | 386.231  | 2 | 4.6  |          | 388.745 | 2 | 0.2  | WLK(Aikene)TR                         | Rbx1  | 89  |
|              | Cul1: 493 - Rbx1: 105 | 5 |          |          |   |      | 795.9872 | 724.363 | 2 | -7.7 | LK(Aikene)QACGFEYTSK                  | Cul1  | 493 |
|              |                       |   |          |          |   |      |          | 837.731 | 3 | 3.2  | TRQVCLDNREWEFQK(Thio)YGH              | Rbx1  | 105 |
|              |                       | 4 | 396.4616 | 386.230  | 2 | 2.0  | 398.9775 | 388.744 | 2 | -2.4 | IMK(Aikene)M(Oxidation)R              | Cul1  | 720 |
|              |                       |   |          | 381.703  | 2 | -1.8 |          | 384.218 | 2 | -3.6 | WLK(Aikene)TR                         | Rbx1  | 89  |
|              | Cul1: 720 - Rbx1: 89  | 4 | 392.4666 | 373.707  | 2 | 2.1  |          |         |   |      | IMK(Aikene)MR                         | Cul1  | 720 |
|              |                       |   |          | 402.216  | 2 | 1.8  |          |         |   |      | WLK(Thio)TR                           | Rbx1  | 89  |
|              |                       | 4 | 400.4610 | 386.230  | 2 | 2.0  | 402.9761 | 388.745 | 2 | 0.2  | IM(Oxidation)K(Aikene)M(Oxidation)R   | Cul1  | 720 |
|              |                       |   |          | 389.702  | 2 | 2.2  |          | 408.201 | 2 | -4.6 | WLK(Aikene)TR                         | Rbx1  | 89  |
|              | Cul1: 743 - Rbx1: 89  | 4 | 359.7025 | 308.184  | 2 | -1.0 |          |         |   |      | FK(Aikene)PR                          | Cul1  | 743 |
|              |                       |   |          | 402.215  | 2 | -0.7 |          |         |   |      | WLK(Thio)TR                           | Rbx1  | 89  |
|              | Cul1: 750 - Rbx1: 89  | 4 | 393.7385 | 376.257  | 2 | -1.2 | 396.2549 | 378.773 | 2 | -0.4 | VPVK(Aikene)K                         | Cul1  | 750 |
|              |                       |   |          | 386.229  | 2 | -0.6 |          | 388.745 | 2 | 0.2  | WLK(Aikene)TR                         | Rbx1  | 89  |
| Rbx1 - Nedd8 | Rbx1: 25 - Nedd8: 6   | 4 | 435.5029 | 453.746  | 2 | -2.1 |          |         |   |      | RFEVK(Thio)K                          | Rbx1  | 25  |
|              |                       |   |          | 407.755  | 2 | -0.7 |          |         |   |      | VK(Aikene)TLTGK                       | Nedd8 | 6   |
|              | Rbx1: 89 - Nedd8: 48  | 4 | 579.2941 | 386.231  | 2 | 4.6  | 581.8102 | 388.745 | 2 | 0.2  | WLK(Aikene)TR                         | Rbx1  | 89  |
|              |                       |   |          | 763.354  | 2 | -1.2 |          | 765.871 | 2 | 0.5  | LIYSGK(Thio)QMNDEK                    | Nedd8 | 48  |
|              | Cul1: 315 - Nedd8: 6  | 5 | 737.9798 | 952.115  | 3 | -5.6 |          |         |   |      | HLEIFHTEFQNLADK(Thio)NEDLGR           | Cul1  | 315 |
|              |                       |   |          | 407.758  | 2 | 6.7  |          |         |   |      | VK(Aikene)TLTGK                       | Nedd8 | 6   |
|              | Cul1: 337 - Nedd8: 6  | 4 | 508.7902 | 600.820  | 2 | 2.9  |          |         |   |      | IQDGLGELK(Thio)K                      | Cul1  | 337 |
|              |                       |   |          | 407.755  | 2 | -0.7 |          |         |   |      | VK(Aikene)TLTGK                       | Nedd8 | 6   |
|              | Cul1: 410 - Nedd8: 6  | 4 |          |          |   |      | 671.1172 | 410.272 | 2 | 2.5  | FINNNAVTK(Thio)MAQSSSK                | Cul1  | 410 |
|              |                       |   |          |          |   |      |          | 922.954 | 2 | -1.9 | VK(Aikene)TLTGK                       | Nedd8 | 6   |
|              |                       | 4 | 672.5969 | 928.438  | 2 | 0.6  | 675.3737 | 930.953 | 2 | -0.2 | FINNNAVTK(Thio)M(Oxidation)AQSSSK     | Cul1  | 410 |
|              |                       |   |          | 407.755  | 2 | -0.7 |          | 410.272 | 2 | 2.5  | VK(Aikene)TLTGK                       | Nedd8 | 6   |
|              | Cul1: 410 - Nedd8: 48 | 4 |          |          |   |      | 841.1733 | 922.959 | 2 | 3.6  | FINNNAVTK(Thio)MAQSSSK                | Cul1  | 410 |
|              |                       |   |          |          |   |      |          | 749.885 | 2 | 0.6  | LIYSGK(Aikene)QMNDEK                  | Nedd8 | 48  |
|              | Cul1: 464 - Nedd8: 6  | 4 | 682.1061 | 407.755  | 2 | -0.7 | 684.6263 | 410.272 | 2 | 2.5  | YIEDKDVQK(Thio)FYAK                   | Cul1  | 464 |
|              |                       |   |          | 947.458  | 2 | -0.2 |          | 949.974 | 2 | 0.1  | VK(Aikene)TLTGK                       | Nedd8 | 6   |
|              | Cul1: 468 - Nedd8: 6  | 4 | 476.5132 | 536.269  | 2 | -5.5 |          |         |   |      | FYAK(Thio)MLAK                        | Cul1  | 468 |
|              |                       |   |          | 407.754  | 2 | -3.1 |          |         |   |      | VK(Aikene)TLTGK                       | Nedd8 | 6   |
|              | Cul1: 493 - Nedd8: 6  | 4 | 591.5557 | 766.351  | 2 | 1.8  | 594.0714 | 768.866 | 2 | 0.9  | LK(Thio)QAC(Carbamidomethyl)GFEYTSK   | Cul1  | 493 |
|              |                       |   |          | 407.756  | 2 | 1.8  |          | 410.272 | 2 | 2.5  | VK(Aikene)TLTGK                       | Nedd8 | 6   |
|              |                       | 3 | 769.3981 | 721.855  | 2 | 3.0  |          |         |   |      | LK(Aikene)QACGFEYTSK                  | Cul1  | 493 |
|              |                       |   |          | 846.478  | 1 | 3.1  |          |         |   |      | VK(Thio)TLTGK                         | Nedd8 | 6   |
|              | Cul1: 493 - Nedd8: 48 | 4 | 761.3638 | 750.367  | 2 | 4.6  | 763.8782 | 752.880 | 2 | 1.0  | LK(Aikene)QAC(Carbamidomethyl)GFEYTSK | Cul1  | 493 |
|              |                       |   |          | 747.368  | 2 | -1.2 |          | 749.886 | 2 | 1.9  | LIYSGK(Aikene)QMNDEK                  | Nedd8 | 48  |
|              |                       | 4 | 747.1072 | 721.855  | 2 | 3.0  | 749.6219 | 724.367 | 2 | -2.1 | LK(Aikene)QACGFEYTSK                  | Cul1  | 493 |
|              |                       |   |          | 763.355  | 2 | 0.1  |          | 765.867 | 2 | -4.7 | LIYSGK(Thio)QMNDEK                    | Nedd8 | 48  |
|              | Cul1: 693 - Nedd8: 6  | 4 | 605.3106 | 793.862  | 2 | 3.3  | 607.8278 | 796.375 | 2 | -0.1 | TEQK(Thio)QEQTTHK                     | Cul1  | 693 |
|              |                       |   |          | 407.757  | 2 | 4.2  |          | 410.271 | 2 | 0.1  | VK(Aikene)TLTGK                       | Nedd8 | 6   |
|              |                       | 5 | 560.6817 | 656.629  | 3 | -2.0 | 562.6959 | 658.310 | 3 | 3.9  | Q(Gln->pyro-Glu)EQETTHK(Thio)NIEEDRK  | Cul1  | 701 |
|              |                       |   |          | 407.754  | 2 | -3.1 |          | 410.275 | 2 | 9.8  | VK(Aikene)TLTGK                       | Nedd8 | 6   |
|              |                       | 5 | 661.3361 | 824.388  | 3 | 1.1  |          |         |   |      | TEQKQEQTTHK(Thio)NIEEDRK              | Cul1  | 701 |
|              |                       |   |          | 407.756  | 2 | 1.8  |          |         |   |      | VK(Aikene)TLTGK                       | Nedd8 | 6   |
|              |                       | 4 | 700.6001 | 984.443  | 2 | 1.2  | 703.1206 | 986.959 | 2 | 1.5  | Q(Gln->pyro-Glu)EQETTHK(Thio)NIEEDRK  | Cul1  | 701 |
|              |                       |   |          | 407.755  | 2 | -0.7 |          | 410.271 | 2 | 0.1  | VK(Aikene)TLTGK                       | Nedd8 | 6   |
|              | Cul1: 701 - Nedd8: 6  | 5 | 564.0879 | 662.307  | 3 | 1.8  | 566.0989 | 663.982 | 3 | -1.4 | QEQTTHK(Thio)NIEEDRK                  | Cul1  | 701 |
|              |                       |   |          | 407.756  | 2 | 1.8  |          | 410.271 | 2 | 0.1  | VK(Aikene)TLTGK                       | Nedd8 | 6   |
|              |                       | 6 | 551.2783 | 618.543  | 4 | 1.4  |          |         |   |      | TEQKQEQTTHK(Thio)NIEEDRK              | Cul1  | 701 |
|              |                       |   |          | 407.756  | 2 | 1.8  |          |         |   |      | VK(Aikene)TLTGK                       | Nedd8 | 6   |
|              |                       | 5 | 635.7173 | 781.694  | 3 | 6.7  |          |         |   |      | TEQKQEQTTHK(Thio)NIEEDRK              | Cul1  | 701 |
|              |                       |   |          | 407.756  | 2 | 1.8  |          |         |   |      | VK(Aikene)TLTGK                       | Nedd8 | 6   |
|              |                       | 4 | 826.6705 | 813.735  | 3 | 6.5  |          |         |   |      | TEQKQEQTTHK(Aikene)NIEEDRK            | Cul1  | 701 |
|              |                       |   |          | 846.480  | 1 | 5.5  |          |         |   |      | VK(Thio)TLTGK                         | Nedd8 | 6   |

Used in final quantitation
